# Supplementary material for: Polyoxometalates and colloidal nanocrystals as building blocks for metal oxide nanocomposite films
Source: Royal Society of Chemistry journal article supplement (doi:10.1039/c1jm10514k), 2011-01-01
Supplement: c1jm10514k.pdf [file c1jm10514k.pdf]

## SUPPLEMENTARY INFORMATION

**Figure SI-1:** Transmission electron micrographs (a-c) and sizing histograms (d-f) of Sn-doped  $\text{In}_2\text{O}_3$  nanocrystals capped with different ligands: (a,b) oleylamine, (d,e)  $\text{BF}_4^-$ , and (c,f)  $(\text{Nb}_6\text{O}_{19})^{8-}$

**Figure SI-2:** Coupled Thermogravimetric and mass spectrometry analysis of the polyniobates and vanadates precursors performed under air (nitrogen in case of V4+) gas flow (25 mL/min) with a heating rate of  $10^\circ\text{C}/\text{min}$ . Gaseous phases are placed in the temperature region where were detected.

**Figure SI-3:** High resolution XPS of Nb 3d peak, from the top, of hexaniobate, annealed hexaniobate, decaniobate, and annealed decaniobate. All annealing was carried out at  $400^\circ\text{C}$  in air. The data are shown in red and fitting results in blue. Black lines beneath each spectrum indicate residuals and data are offset for clarity.

**Figure SI-4:** (a) Hydrodynamic sizes (b) and zeta potential measured at different steps of the ex-situ ligand exchange process. ITO nanocrystals were capped with  $\text{BF}_4^-$  (in black),  $(\text{Nb}_6\text{O}_{19})^{8-}$  (in pink) and,  $(\text{Nb}_{10}\text{O}_{28})^{6-}$  (in blue).

**Figure SI-5:** Cross sectional low resolution HAADF imaging (a) and EDS mapping (b-f) of a  $\text{Nb}_2\text{O}_5$ -ITO nanocomposite film on a silicon substrate, prepared by ex-situ ligand exchange. Silicon (e) and oxygen (d) appear in the protection layer immediately on top of the composite, followed by Pt (f).

**Figure SI-6:** Transmission electron micrograph of  $(\text{Nb}_6\text{O}_{19})^{8-}$  capped ITO colloidal NCs. The NCs appear embedded within a continuous polyoxometalate matrix.

**Figure SI-7:** Fourier Transform Infrared (FTIR) spectra during the ex-situ ligand exchange of OLAM using  $\text{NOBF}_4/\text{DMF}$  and POMs. a) In black is shown the OLAM-capped ITO NC film prior to the exchange. In blue, are the same NCs after the exchange using  $\text{NOBF}_4/\text{DMF}$ . The C-H stretching bands from OLAM disappear while DMF and  $\text{BF}_4$  bands appear confirming the effectiveness of the ligand exchange. b) Final decaniobate-ITO nanocomposite film is shown in pink together with the control sample prior exchange. The broad absorption band in both spectra is assigned to the surface plasmon resonance from free carriers in the ITO

nanocrystals. In addition to that, waters of crystallization in the POM structure also contribute to the broad band.

**Figure SI-8:** EDS spectra of Nb<sub>2</sub>O<sub>5</sub>-ITO nanocomposite films obtained from a) the ex-situ and b) the in-situ ligand exchange approaches. In to Nb atomic ratios were 0.3:1 in a) and 3:1 in b). The no appearance of the Si substrate peak in a) is due to the film was much thicker than b).

**Table SI-1:** Surface composition of ITO nanocomposite films determined from XPS analysis

**Table SI-2:** Surface composition of vanadium oxide films determined from XPS analysis

**Table SI-3:** Surface composition of niobium oxide films determined from XPS analysis

**Table SI-4:** XPS peak fitting parameters of vanadium oxide films

### **Estimation of the NC volume fraction and the edge-to-edge interparticle spacing**

The volume fraction of each component phase in the final metal oxide nanocomposite films was estimated from the metal atomic ratios measured by EDS and their bulk densities.

Distances between edges of the embedded nanocrystals in the films were estimated by assuming monodispersed spherical nanoparticles with regular spacing. This approximation leads to the following expression:

$$\text{NC spacing} = 2R((0.74/f_{\text{NC}})^{1/3} - 1)$$

, where R is the NC radius and  $f_{\text{NC}}$  the NC volume fraction

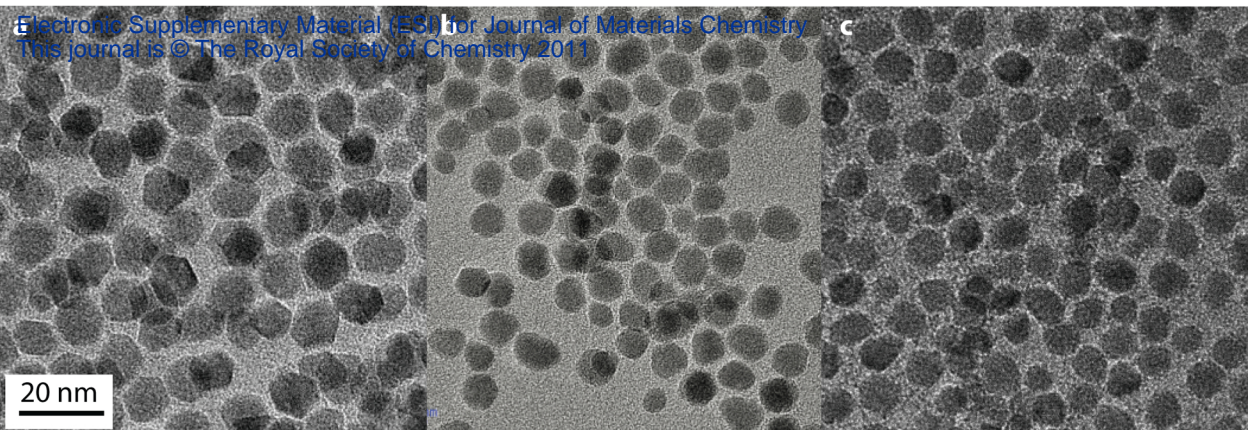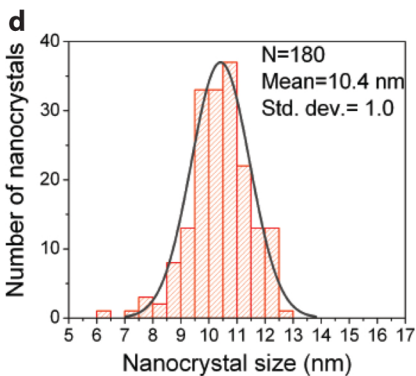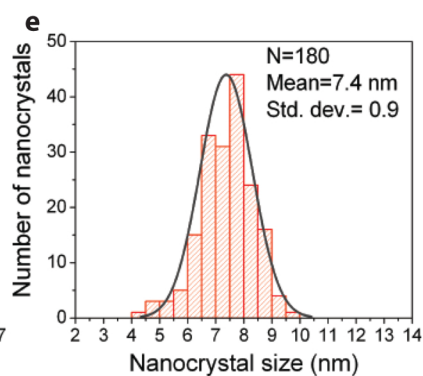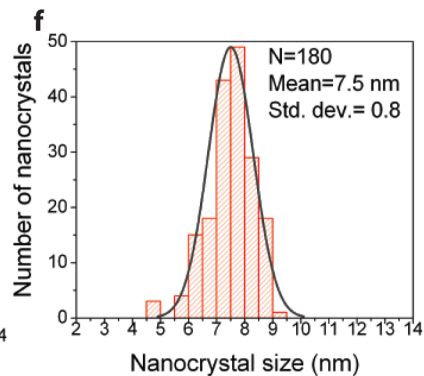

Figure SI1.

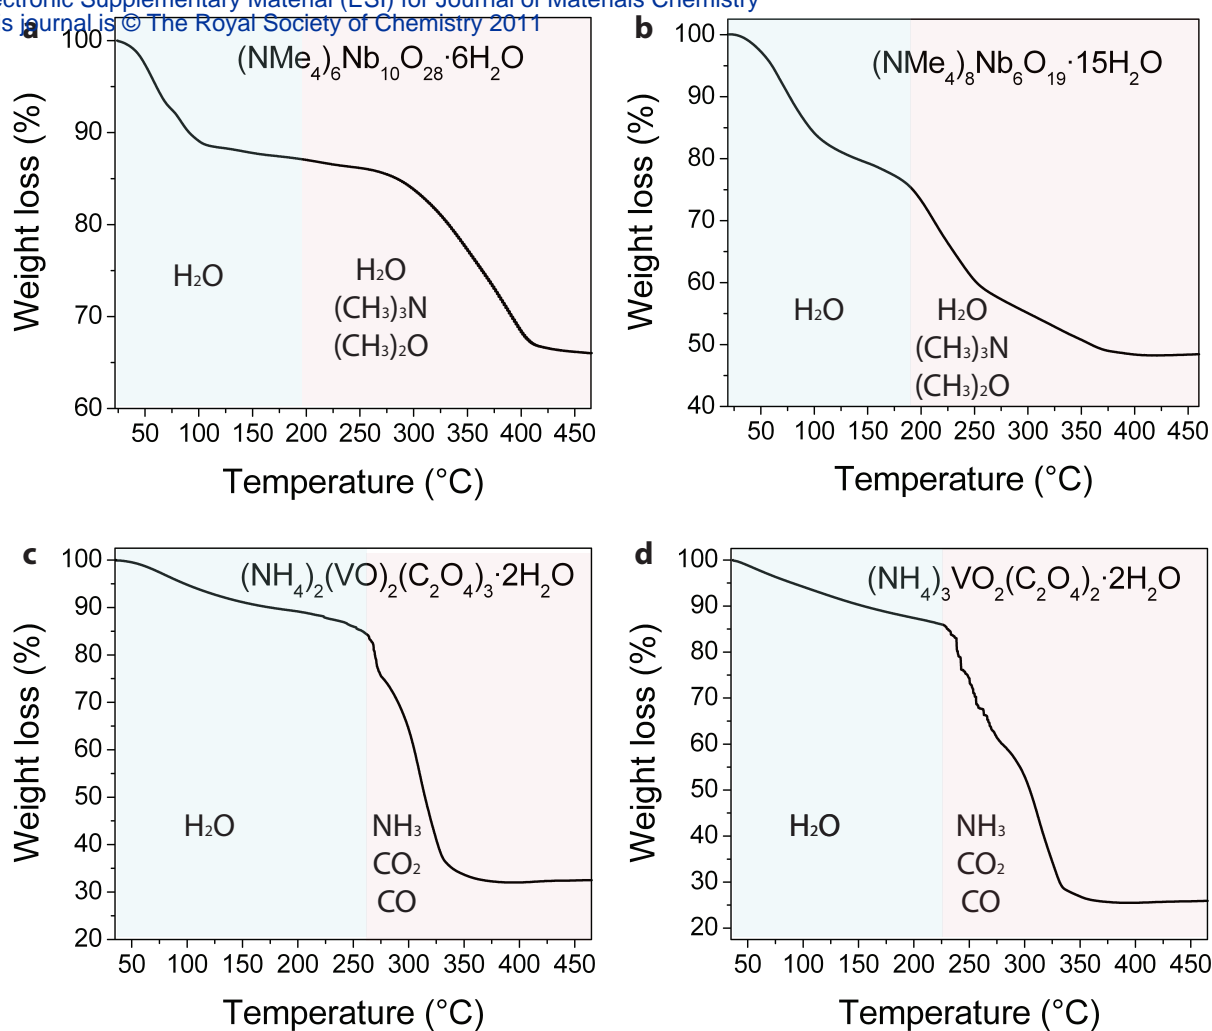

Figure SI2.



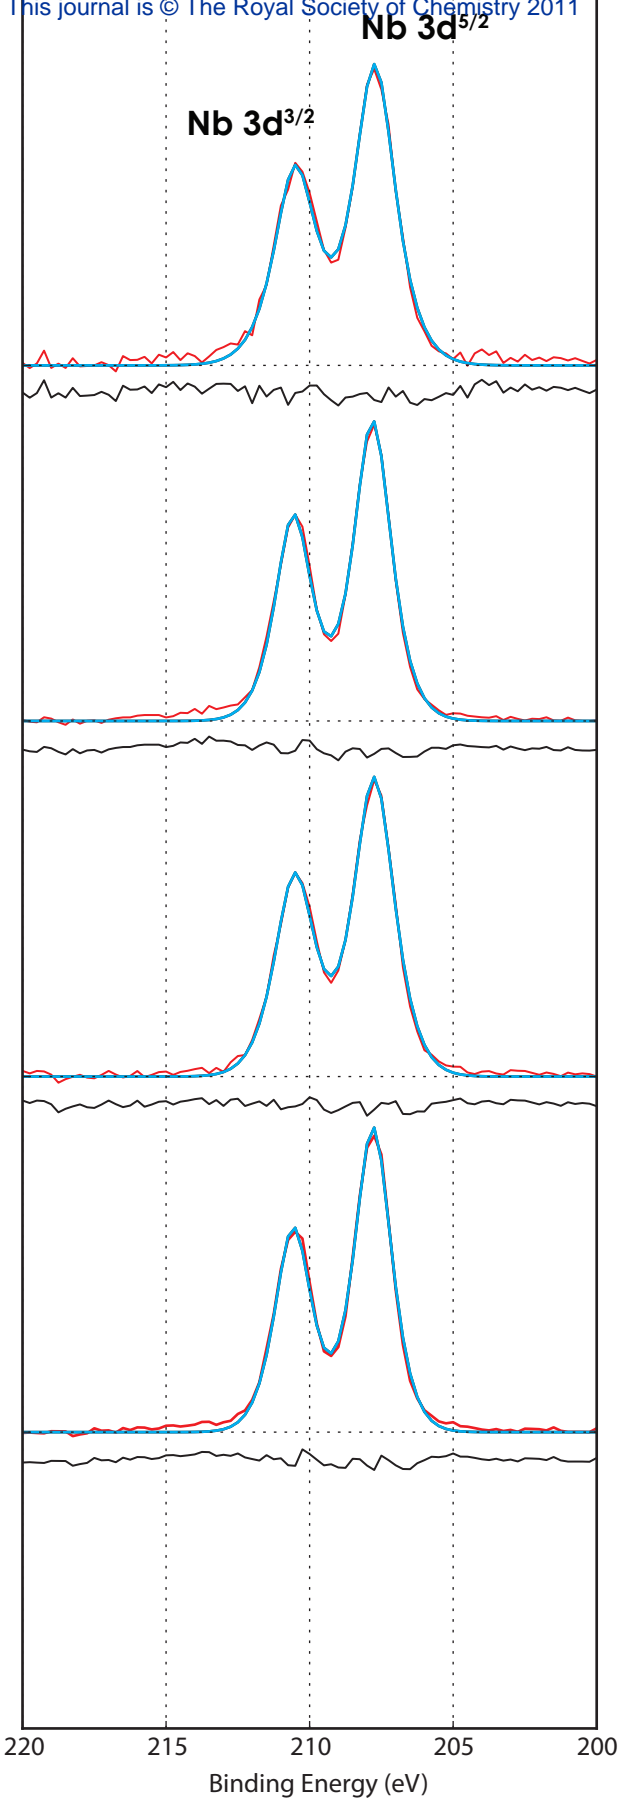

Figure S13.

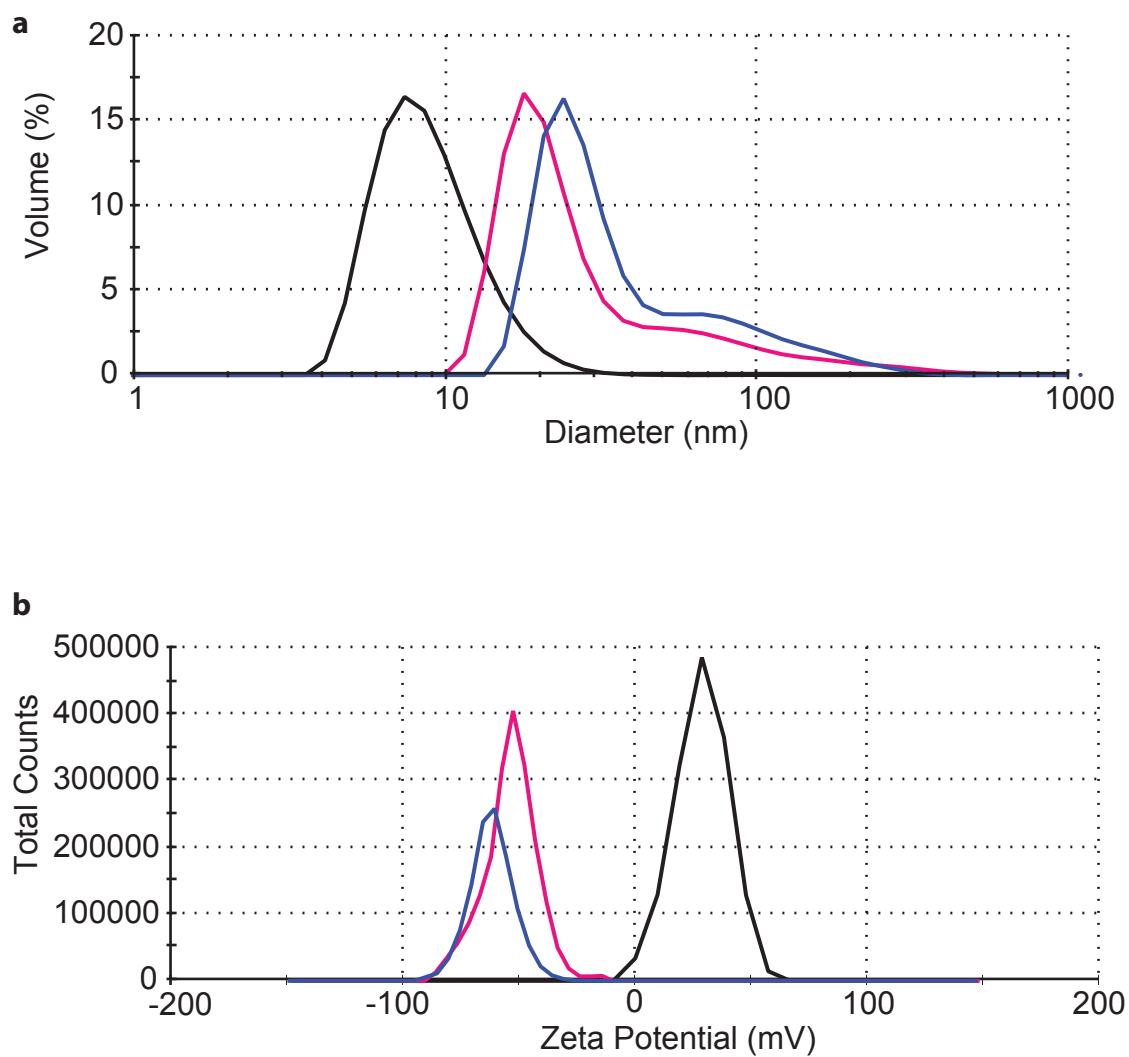

Figure SI4.

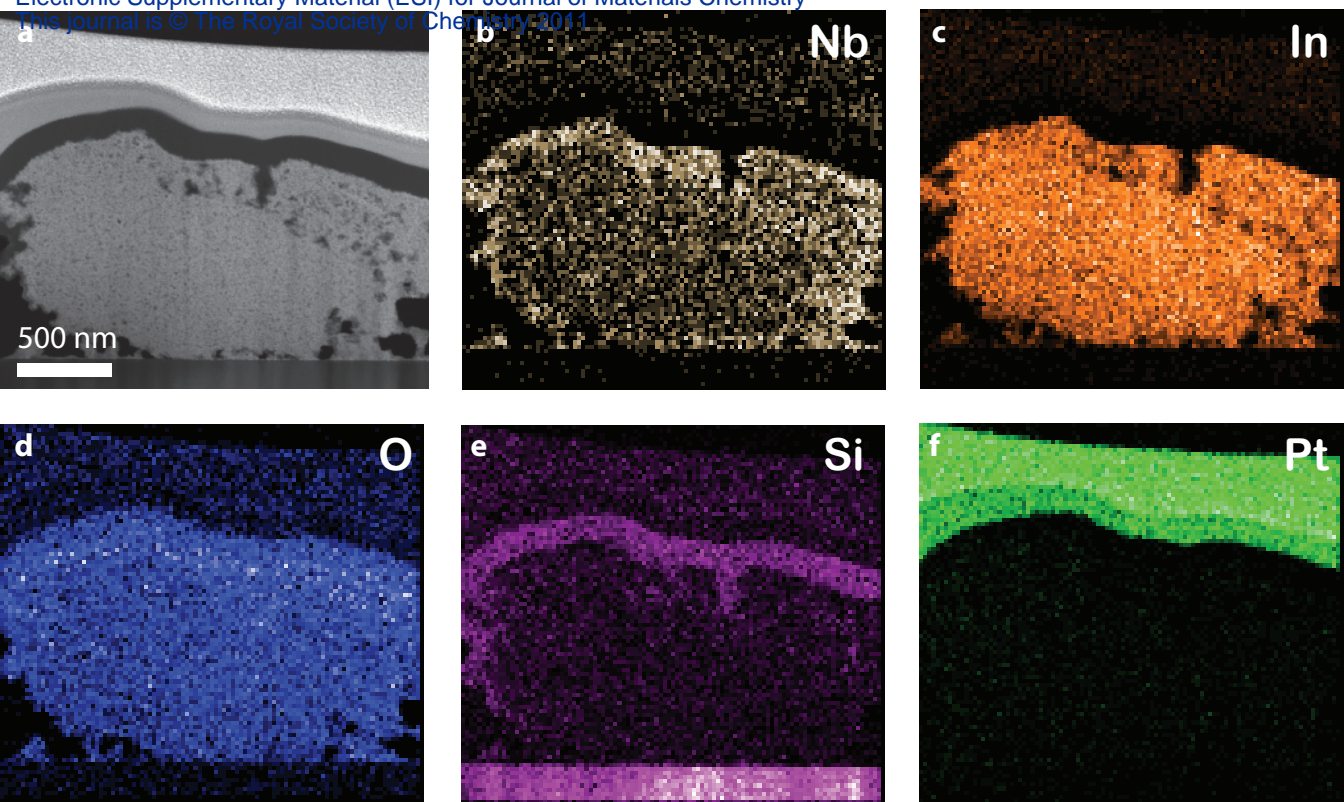

Figure SI5.

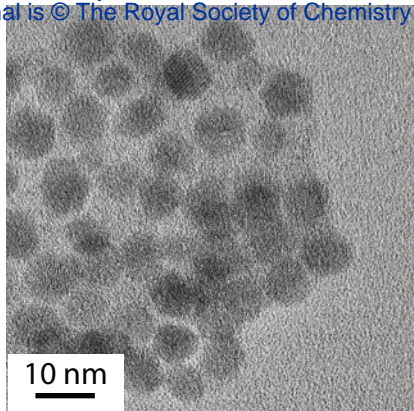

Figure S16.

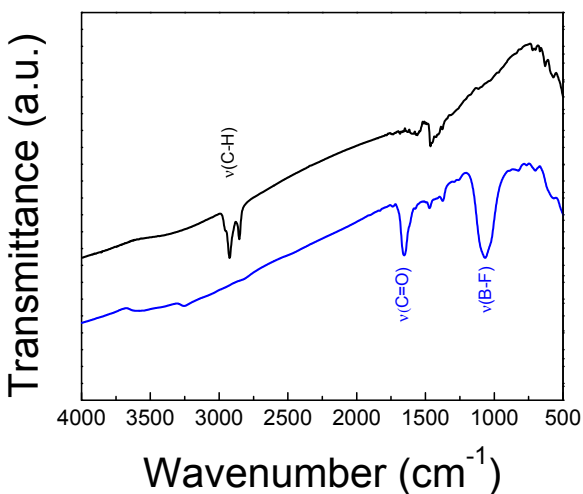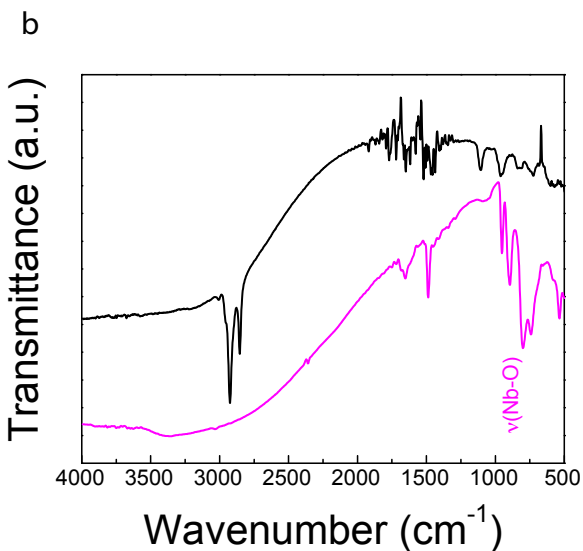

Figure SI 7.

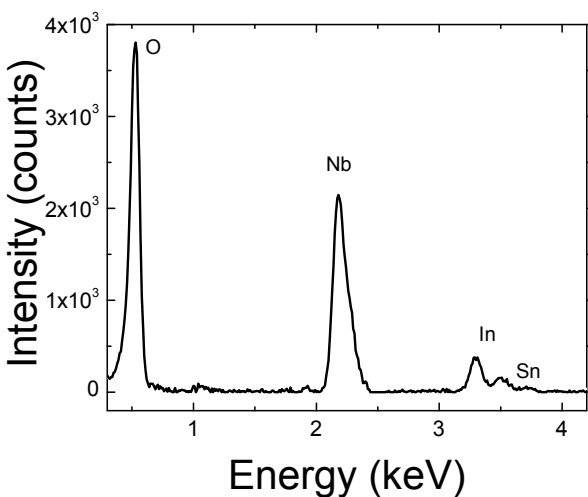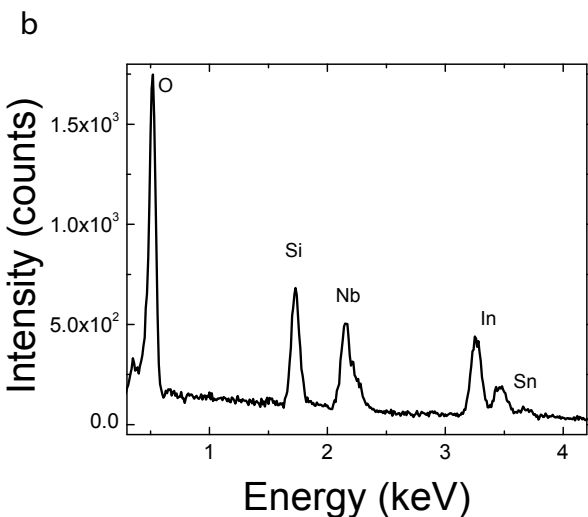

Figure SI 8.



Table SI1

| ITO Composites – XPS Surface Composition |             |                    |             |                    |
|------------------------------------------|-------------|--------------------|-------------|--------------------|
| Sample                                   | Peak Name   | Peak Position (eV) | Scaled Area | Atomic Composition |
| ITO-Nb10 Annealed                        | C 1s        | 285.2              | 28262       | 37%                |
|                                          | O 1s        | 530.3              | 16609       | 22%                |
|                                          | O 1s        | 532.0              | 14716       | 19%                |
|                                          | In 3d       | 444.9              | 13506       | 18%                |
|                                          | Sn 3d       | 486.8              | 1428        | 2%                 |
|                                          | Nb 3d       | 207.7              | 1634        | 2%                 |
|                                          | Total Area: |                    | 76154       |                    |
| ITO-Nb6 Annealed                         | C 1s        | 285.3              | 27701       | 36%                |
|                                          | O 1s        | 530.3              | 19176       | 25%                |
|                                          | O 1s        | 532.1              | 14998       | 19%                |
|                                          | In 3d       | 445.0              | 13166       | 17%                |
|                                          | Sn 3d       | 486.9              | 1427        | 2%                 |
|                                          | Nb 3d       | 207.7              | 1313        | 2%                 |
|                                          | Total Area: |                    | 77781       |                    |
| ITO-V(5+) Annealed                       | C 1s        | 285.4              | 33365       | 40%                |
|                                          | O 1s        | 531.9              | 20100       | 24%                |
|                                          | O 1s        | 530.3              | 14135       | 17%                |
|                                          | In 3d       | 445.0              | 13168       | 16%                |
|                                          | Sn 3d       | 486.9              | 1686        | 2%                 |
|                                          | V 2p        | 516.4              | 1913        | 2%                 |
|                                          | Total Area: |                    | 84367       |                    |

Table SI2

| Vanadium Oxide – XPS Surface Composition |           |                    |             |                    |
|------------------------------------------|-----------|--------------------|-------------|--------------------|
| Sample                                   | Peak Name | Peak Position (eV) | Scaled Area | Atomic Composition |
| V(5+) Nonannealed                        | C 1s      | 285.5              | 41663       | 47%                |
|                                          | O 1s      | 530.2              | 18446       | 21%                |
|                                          | O 1s      | 532.3              | 15515       | 17%                |
|                                          | V 2p      | 516.4              | 12728       | 14%                |
| Total Area:                              |           |                    | 88789       |                    |
| V(5+) Annealed Air                       | C 1s      | 285.0              | 32046       | 35%                |
|                                          | O 1s      | 529.7              | 25344       | 28%                |
|                                          | O 1s      | 531.7              | 18666       | 20%                |
|                                          | V 2p      | 516.8              | 14700       | 16%                |
| Total Area:                              |           |                    | 91392       |                    |
| V(4+) Nonannealed                        | C 1s      | 289.4              | 13084       | 25%                |
|                                          | C 1s      | 285.2              | 8673        | 17%                |
|                                          | O 1s      | 532.5              | 24245       | 47%                |
|                                          | O 1s      | 529.5              | 947         | 2%                 |
|                                          | V 2p      | 516.0              | 4238        | 8%                 |
| Total Area:                              |           |                    | 51487       |                    |
| V(4+) Annealed Nitrogen                  | C 1s      | 285.2              | 35853       | 36%                |
|                                          | C 1s      | 285.2              | 2048        | 2%                 |
|                                          | O 1s      | 529.9              | 24795       | 25%                |
|                                          | O 1s      | 531.8              | 18467       | 19%                |
|                                          | V 2p      | 516.3              | 17541       | 18%                |
| Total Area:                              |           |                    | 99334       |                    |

Table SI3

| Niobium Oxide – XPS Surface Composition |           |                    |             |                    |
|-----------------------------------------|-----------|--------------------|-------------|--------------------|
| Sample                                  | Peak Name | Peak Position (eV) | Scaled Area | Atomic Composition |
| Nb10 Annealed                           | C 1s      | 285.4              | 14895       | 27%                |
|                                         | O 1s      | 530.6              | 15618       | 28%                |
|                                         | O 1s      | 531.7              | 14023       | 25%                |
|                                         | Nb 3d     | 207.8              | 11491       | 21%                |
| Total Area:                             |           |                    | 56026       |                    |
| Nb10 Nonannealed                        | C 1s      | 287.1              | 40009       | 48%                |
|                                         | O 1s      | 533.2              | 11234       | 13%                |
|                                         | O 1s      | 531.0              | 21852       | 26%                |
|                                         | Nb 3d     | 207.7              | 11000       | 13%                |
| Total Area:                             |           |                    | 84094       |                    |
| Nb6 Annealed                            | C 1s      | 285.5              | 22264       | 32%                |
|                                         | O 1s      | 530.7              | 19692       | 28%                |
|                                         | O 1s      | 531.9              | 14575       | 21%                |
|                                         | Nb 3d     | 207.8              | 12566       | 18%                |
| Total Area:                             |           |                    | 69097       |                    |
| Nb6 Nonannealed                         | C 1s      | 286.7              | 57491       | 58%                |
|                                         | O 1s      | 533.8              | 21352       | 22%                |
|                                         | O 1s      | 531.1              | 14930       | 15%                |
|                                         | Nb 3d     | 207.7              | 4971        | 5%                 |
| Total Area:                             |           |                    | 98745       |                    |

Table SI4

| Vanadium Oxide – Peak Fitting Parameters |           |                    |                 |                     |
|------------------------------------------|-----------|--------------------|-----------------|---------------------|
| Sample                                   | Peak Name | Peak Position (eV) | Peak Width (eV) | Gaussian/Lorentzian |
| V(5+) Nonannealed                        | O 1s      | 532.6              | 2.9             | 0.51                |
|                                          | O 1s      | 530.2              | 2.1             | 0.54                |
|                                          | V 2p      | 516.5              | 3.0             | 0.81                |
| V(5+) Annealed Air                       | O 1s      | 531.9              | 2.8             | 0.51                |
|                                          | O 1s      | 529.7              | 1.8             | 0.53                |
|                                          | V 2p      | 516.8              | 2.1             | 0.95                |
| V(4+) Nonannealed                        | O 1s      | 532.5              | 2.2             | 0.55                |
|                                          | O 1s      | 529.0              | 3.1             | 0.52                |
|                                          | V 2p      | 517.0              | 3.3             | 0.89                |
|                                          | V 2p      | 514.4              | 2.9             | 0.34                |
| V(4+) Annealed Nitrogen                  | O 1s      | 532.2              | 3.1             | 0.52                |
|                                          | O 1s      | 529.9              | 2.0             | 0.54                |
|                                          | V 2p      | 516.4              | 3.1             | 0.85                |

Table SI5

| Niobium Oxide – Peak Fitting Parameters |           |                    |                 |                     |
|-----------------------------------------|-----------|--------------------|-----------------|---------------------|
| Sample                                  | Peak Name | Peak Position (eV) | Peak Width (eV) | Gaussian/Lorentzian |
| Nb6 Nonannealed                         | O 1s      | 533.8              | 2.2             | 0.52                |
|                                         | O 1s      | 531.1              | 2.7             | 0.53                |
| Nb6 Annealed                            | O 1s      | 531.7              | 3.4             | 0.55                |
|                                         | O 1s      | 530.7              | 1.6             | 0.47                |
| Nb10 Nonannealed                        | O 1s      | 533.3              | 2.6             | 0.53                |
|                                         | O 1s      | 531.0              | 1.9             | 0.55                |
| Nb10 Annealed                           | O 1s      | 531.6              | 3.1             | 0.55                |
|                                         | O 1s      | 530.6              | 1.5             | 0.46                |
